# Supplementary material
Source: PubMed Central journal article supplement (PMC4186794)

## SUPPLEMENTARY INFORMATION

### Supplementary Figure Legends

**Supplementary Figure 1: Purification of human HSC from cord blood.** (A) Flow cytometry plots and gating strategy used for the purification of human HSC, defined as Lin<sup>-</sup>CD34<sup>+</sup>CD38<sup>-</sup>CD90<sup>+</sup> cells, from cord blood. (B) Post-sort analysis of purified human HSC from panel A.

**Supplementary Figure 2: Comparison of Esam1 cell surface expression on CD34<sup>+</sup> and CD34<sup>-</sup>KLSF (c-kit<sup>+</sup>Lin<sup>-</sup>Sca1<sup>+</sup>Fik2<sup>-</sup>) cells from mouse BM.**

**Supplementary Figure 3: Analysis of Esam1 cell surface expression on defined hematopoietic subpopulations from mouse BM.** (A) Flow cytometry plots and gating strategy used to assess Esam1 cell surface protein expression. Grey histograms, negative control stain (fluorescence minus one); red histograms, Esam1 expression. CMP, common myeloid progenitors; GMP, granulocyte/monocyte progenitor; MEP, megakaryocyte/erythroid progenitor; CLP, common lymphoid progenitor.

**Supplementary Figure 4: Enrichment of putative HSC using Esam1 as a marker in different mouse strains.** Esam1 strongly enriches for the putative HSC-containing c-kit<sup>+</sup>Slamf1<sup>+</sup>Lin<sup>-</sup> population in C57BL/6, FVB, BALB/c and AKR strains. The left column shows the c-kit versus Slamf1 profile for the Lin<sup>-</sup> cell population across four different mouse strains and the right column shows the c-kit versus Slamf1 profile for the Lin<sup>-</sup>Esam1<sup>+</sup> cell population across the four different mouse strains as indicated. Adding Esam1 as a marker enriches for c-kit<sup>+</sup>Slamf1<sup>+</sup>Lin<sup>-</sup> cells in all strains examined.

**Supplementary Figure 5: Peripheral blood chimerism in mice transplanted with 10<sup>5</sup> unfractionated mononuclear bone marrow cells from wildtype or Esam1-deficient mice.** (A)

Total donor chimerism. WBM cell from  $Esam1^{-/-}$  mice give rise to slightly more progeny compared to WBM cells from wt mice. Differences were not statistically significant ( $p > 0.05$ ). **(B)** Cell type composition in mice from (A). By 21 weeks, mice transplanted with cells from  $Esam1$ -deficient mice gave rise to more T cells as compared to mice transplanted with cells from wildtype mice (\*,  $p < 0.008$ , Student's *t* test).

# Supplemental Figure 1

Forsberg

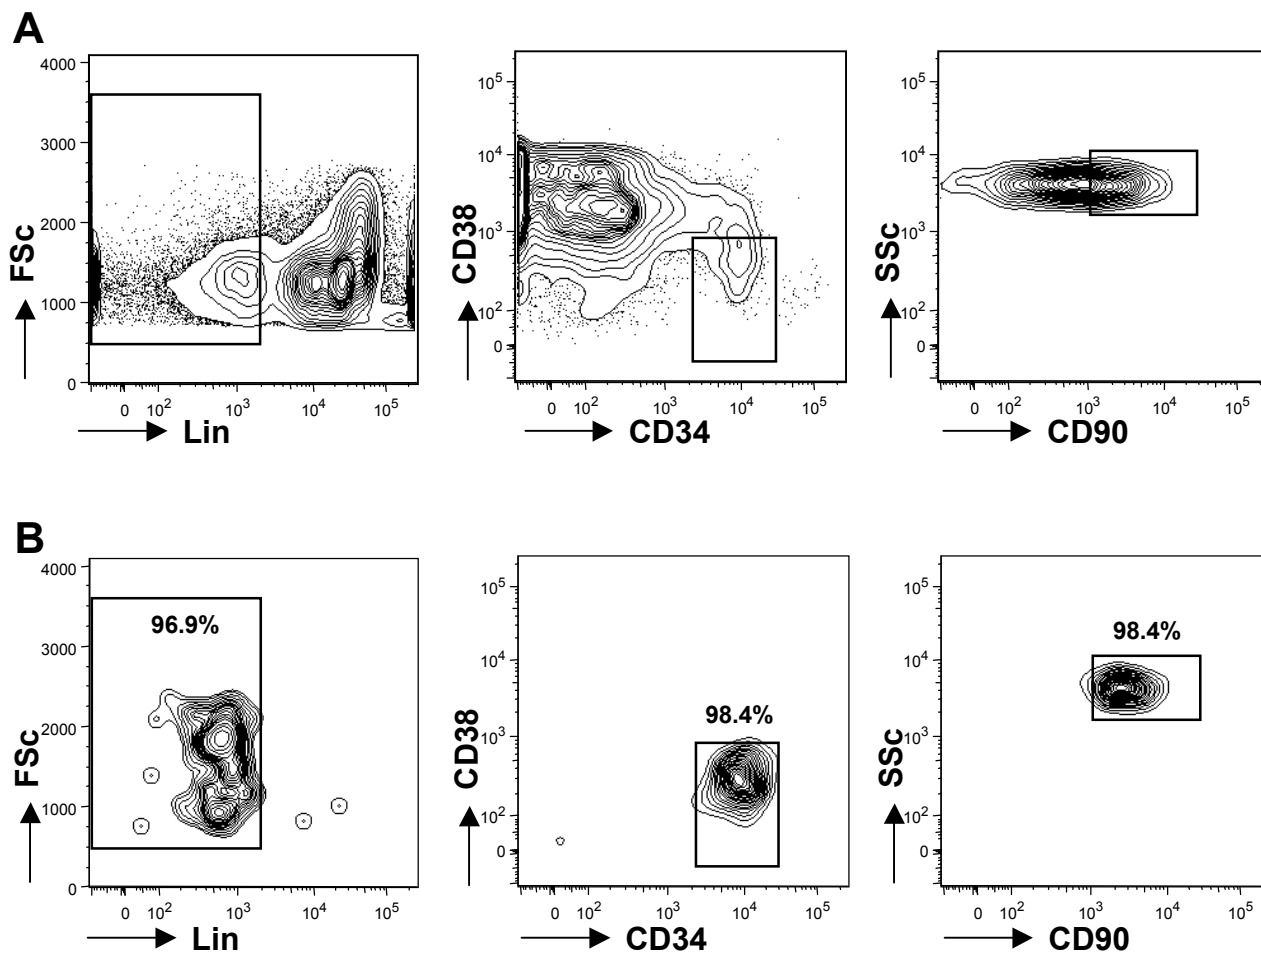

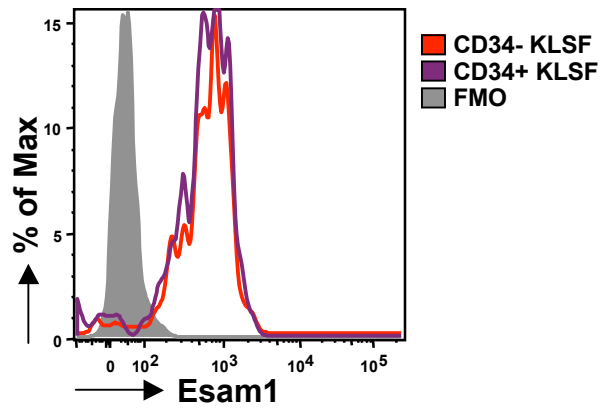

# Supplemental Figure 3

Forsberg

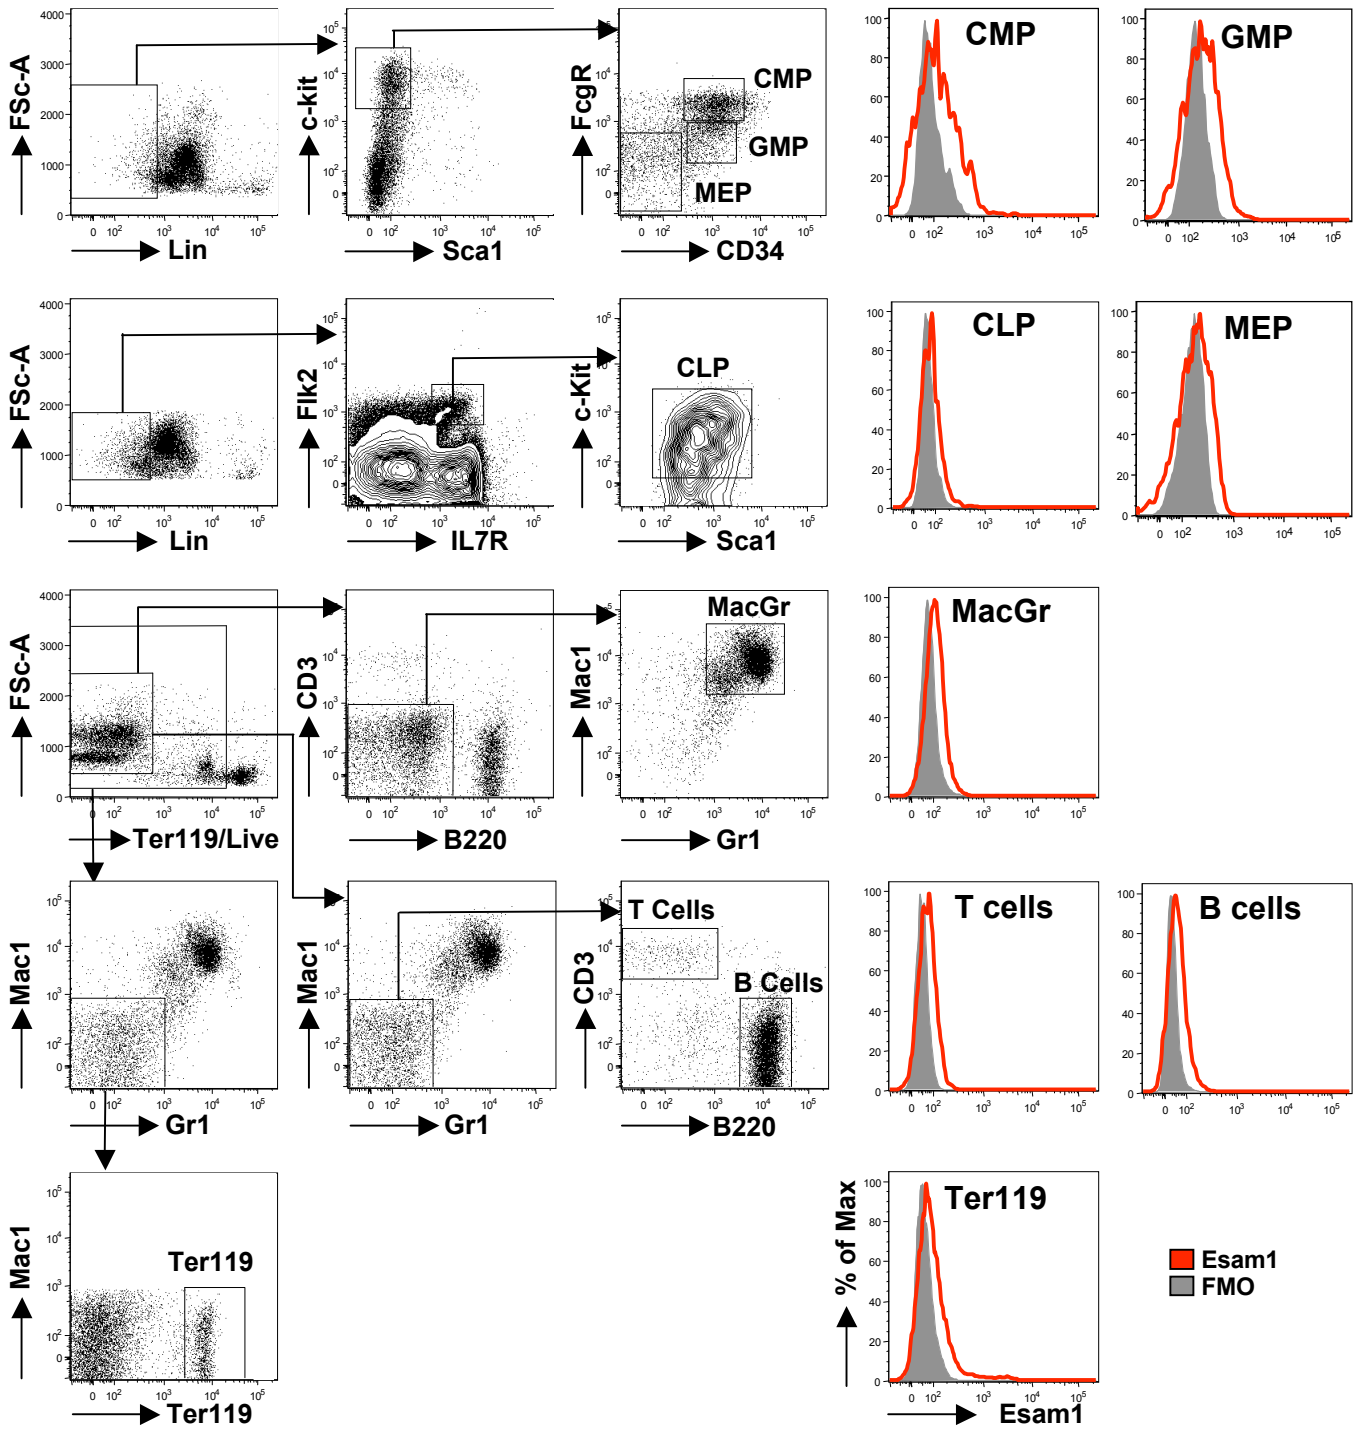

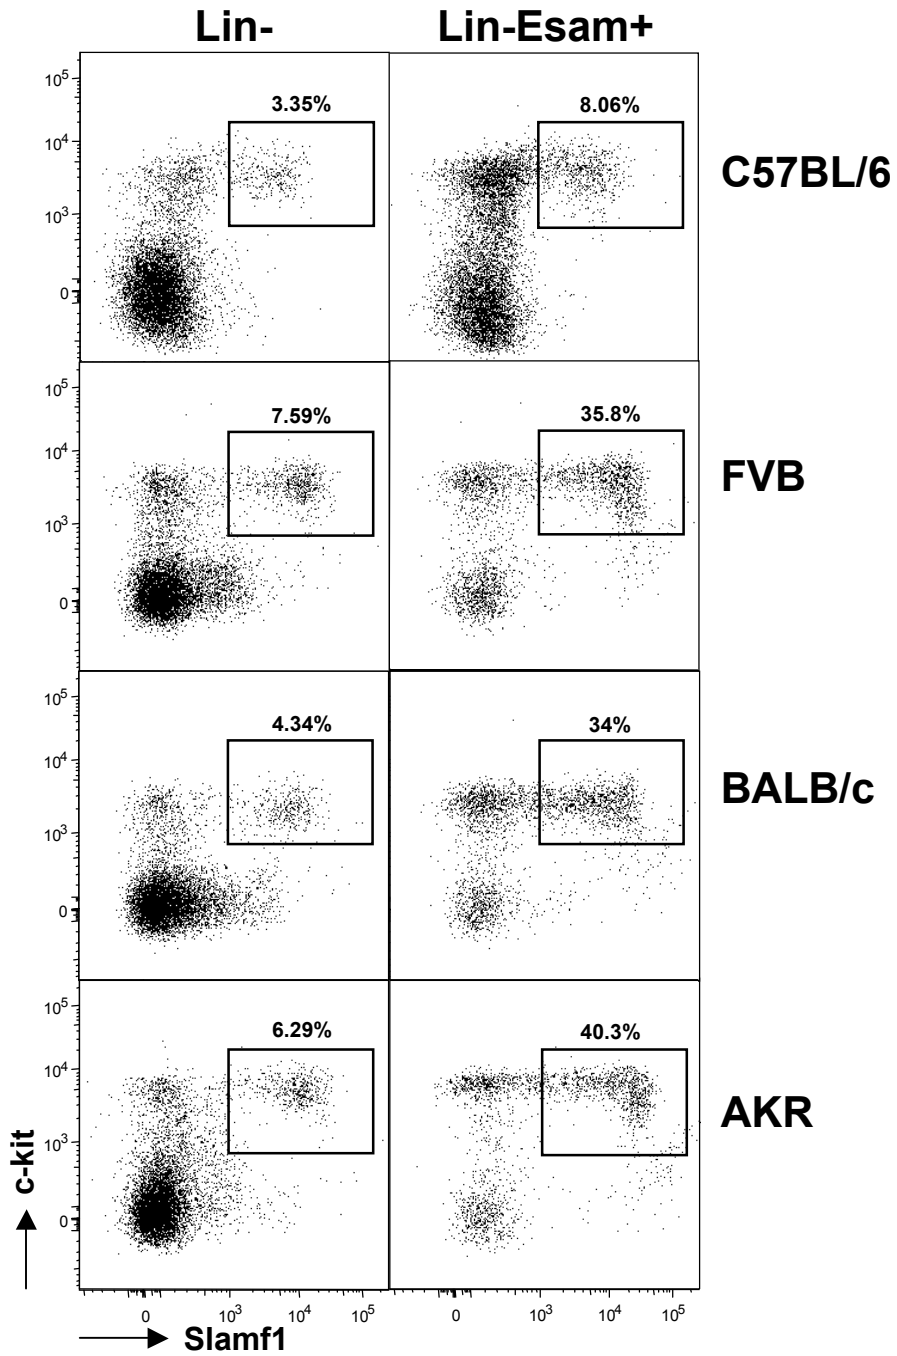

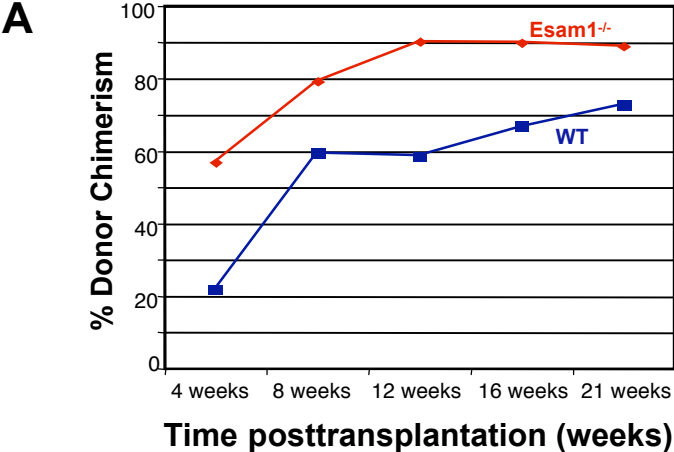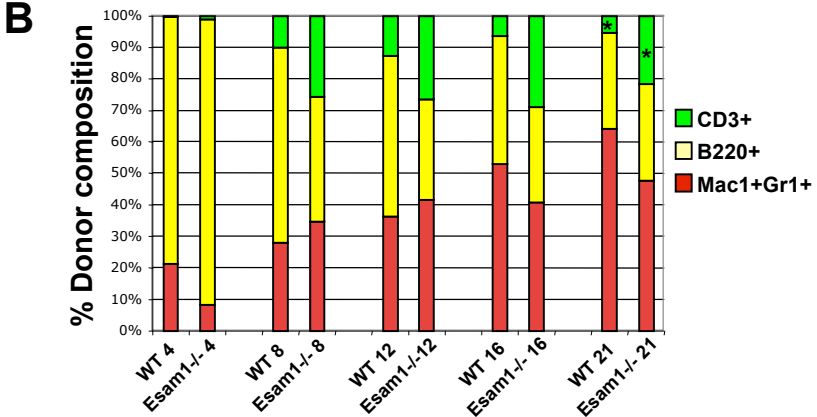

Supplement: NIHMS507685-supplement-supplement_1.pdf [file NIHMS507685-supplement-supplement_1.pdf]
